# Supplementary material for: Adaptive responses of marine diatoms to zinc scarcity and ecological implications
Source: PubMed Central journal article supplement (PMC9010474; doi:10.1038/s41467-022-29603-y), 2022-04-14
Supplement: 41467_2022_29603_MOESM3_ESM.pdf [file 41467_2022_29603_MOESM3_ESM.pdf]

## **Description of Additional Supplementary Files**

File Name: Supplementary Data 1

Description: Primer sequences
